# Supplementary material for: Intrinsic poorly-crystallized Fe5O7(OH)·4H2O: a highly efficient oxygen evolution reaction electrocatalyst under alkaline conditions
Source: Royal Society of Chemistry journal article supplement (doi:10.1039/c9ra06374a), 2019-01-01
Supplement: c9ra06374a1.pdf [file c9ra06374a1.pdf]

## Electronic Supplementary Information for

# Intrinsic poor-crystallized $\text{Fe}_5\text{O}_7(\text{OH})\cdot 4\text{H}_2\text{O}$ : A highly efficient oxygen evolution reaction electrocatalyst under alkaline conditions

Xiaoteng Ding,<sup>†a</sup> Wei Cui,<sup>†b</sup> Xiaohua Zhu,<sup>c</sup> Jianwei Zhang,<sup>\*d</sup> and Yusheng Niu<sup>\*a</sup>

## Experimental Section

### Characterizations

Powder X-ray diffraction (XRD) data were obtained on a RigakuD/MAX 2550 diffractometer with Cu K $\alpha$  radiation ( $\lambda=1.5418 \text{ \AA}$ ). Scanning electron microscopy (SEM) measurements were conducted on a Hitachi S-4800 field emission scanning electron microscope at an accelerating voltage of 20 kV. Transmission electron microscopy (TEM) measurements were made on a Hitachi H-8100 electron microscopy (Hitachi, Tokyo, Japan) with an accelerating voltage of 200 kV. X-ray photoelectron spectroscopy (XPS) measurements were carried out on an ESCALABMK II X-ray photoelectron spectrometer using Mg as the exciting source. The electron spin resonance (ESR) spectra were collected on a Bruker A300 Paramagnetic spectrometer, which were performed at room temperature in vacuum.

### Electrochemical measurements

Electrochemical measurements were performed with a CHI 660E electrochemical analyzer (CH Instruments, Inc., Shanghai) in a typical three electrode system, with  $\text{Fe}_5\text{O}_7(\text{OH})\cdot 4\text{H}_2\text{O}/\text{NF}$  as working electrode, graphite as counter electrode and Hg/HgO as reference electrode. All tests were carried out at room temperature.

### TOF calculation

TO calculate TOF, the surface concentration of active sites related to the redox species should be first obtained. On the basis of the electrochemical CV curves (Fig. S4a and S4c), the oxidation peak current of redox species demonstrates linear change on scan rates (Fig. S4b and S4d). The slope of the line can be calculated using the following equation:

$$slope = \frac{n^2 F^2 A \tau_0}{4RT}$$

$n$  is the number of electrons transferred,  $F$  is Faraday's constant,  $A$  is the surface area of the electrode,  $\tau_0$  is the surface concentration of active sites ( $\text{mol cm}^{-2}$ ), and  $R$  and  $T$  are the ideal gas constant and the absolute temperature, respectively. TOF values can be finally calculated based on the formula:

$$TOF = \frac{JA}{4FM}$$

$J$  is the current density at certain overpotential,  $A$  is the area of the electrode,  $4$  indicates the mole of electrons consumed for evolving one mole of  $\text{O}_2$  from water,  $F$  is Faraday's constant and  $m$  is the number of moles for active sites.

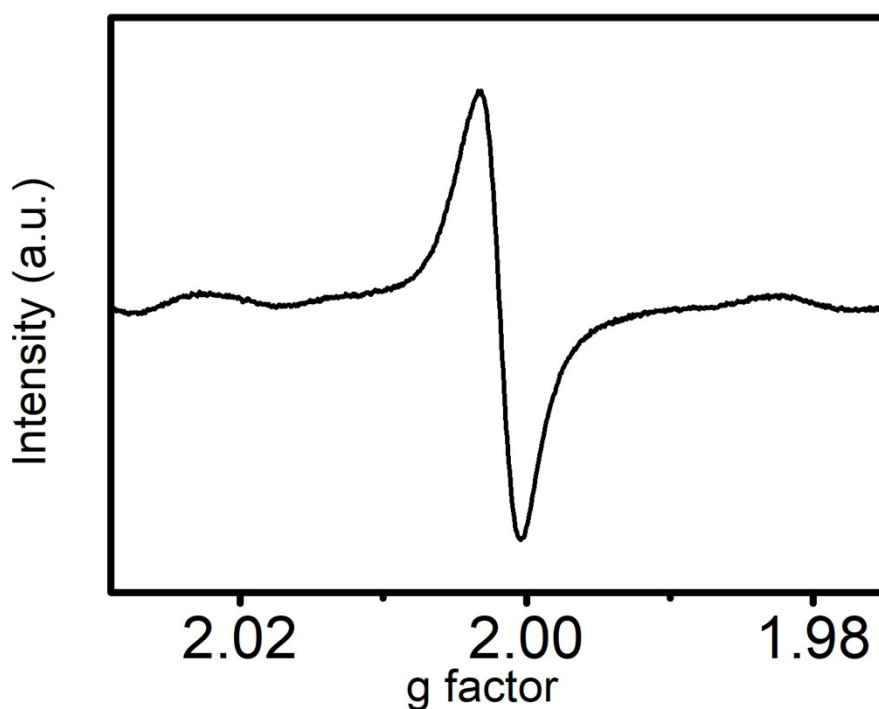

**Fig. S1.** ESR spectrum of  $\text{Fe}_5\text{O}_7(\text{OH})\cdot 4\text{H}_2\text{O}$  nanosheet

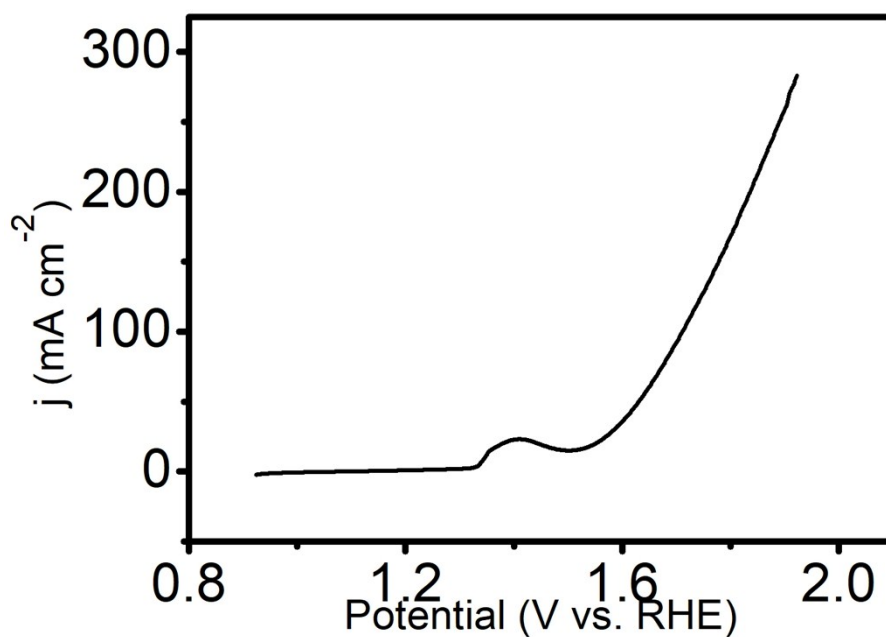

**Fig. S2.** LSV spectrum of  $\text{Fe}_5\text{O}_7(\text{OH})\cdot 4\text{H}_2\text{O}/\text{NF}$  after high-temperature treatment.

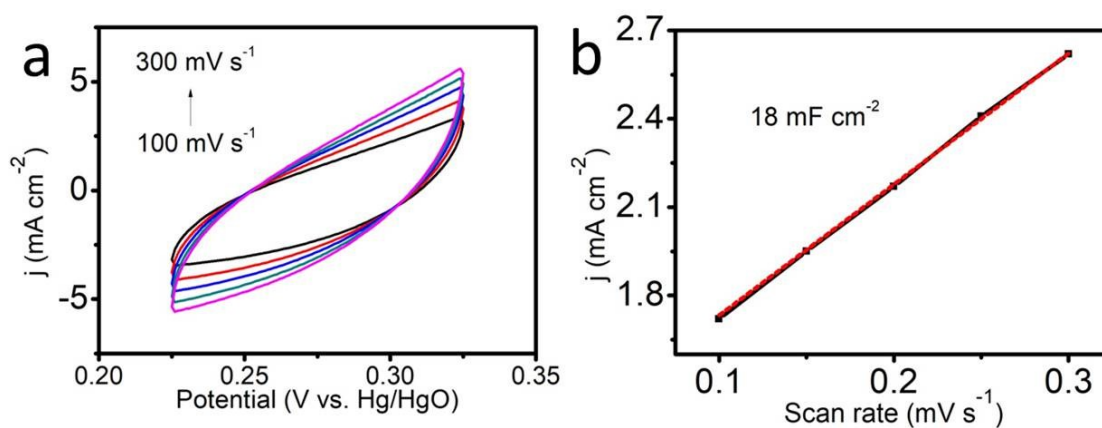

**Fig. S3.** Cyclic voltammograms of (a)  $\text{Fe}_5\text{O}_7(\text{OH})\cdot 4\text{H}_2\text{O}/\text{NF}$  in the non-faradaic capacitance current range at scan rates of 100, 150, 200, 250 and 300  $\text{mV s}^{-1}$ . (d) The linear dependence of capacitive current at 0.27 V vs. Hg/HgO on the scan rate for  $\text{Fe}_5\text{O}_7(\text{OH})\cdot 4\text{H}_2\text{O}/\text{NF}$ .

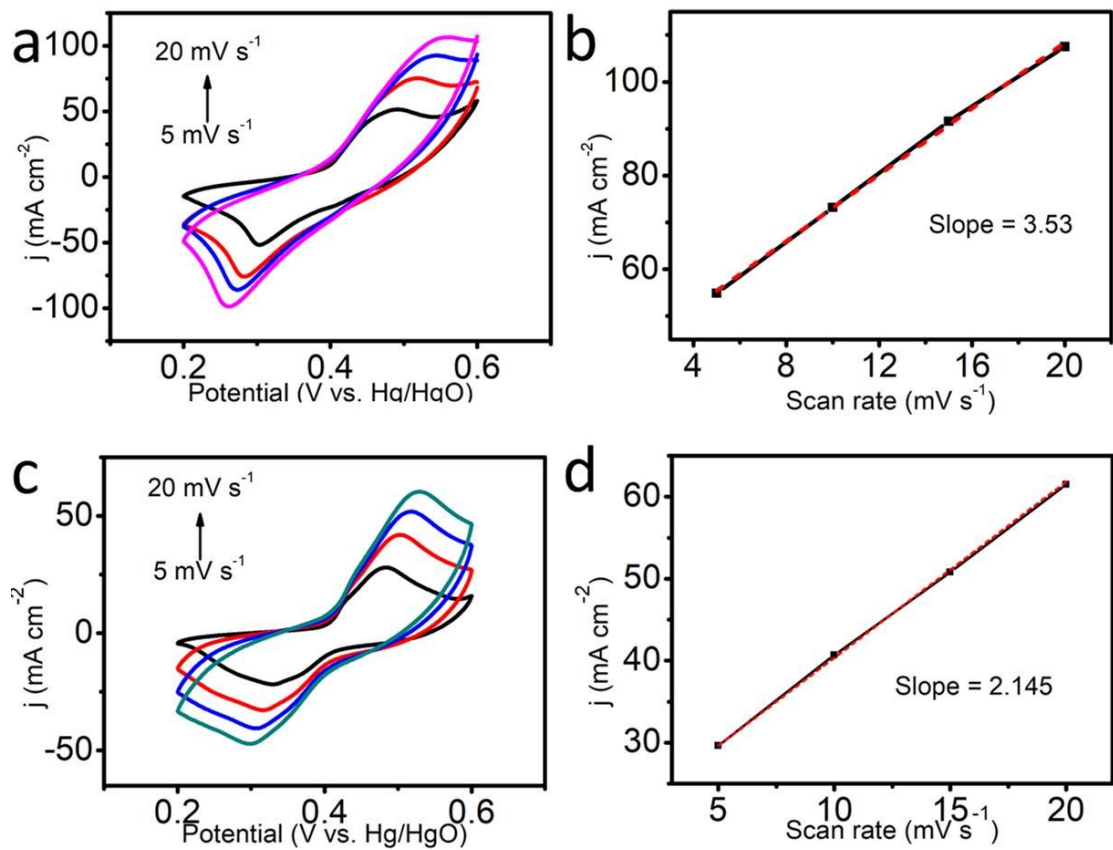

**Fig. S4.** Cyclic voltammograms of (a)  $\text{Fe}_5\text{O}_7(\text{OH})\cdot 4\text{H}_2\text{O}/\text{NF}$  and (c)  $\text{Fe}_5\text{O}_7(\text{OH})\cdot 4\text{H}_2\text{O}/\text{NF}$  after heat treatment at scan rates of 5, 10, 15, and 20  $\text{mV s}^{-1}$ . (b, d) The linear plot related to the oxidation currents for redox species as a function of scan rates for (b)  $\text{Fe}_5\text{O}_7(\text{OH})\cdot 4\text{H}_2\text{O}/\text{NF}$  and (d)  $\text{Fe}_5\text{O}_7(\text{OH})\cdot 4\text{H}_2\text{O}/\text{NF}$  after heat treatment.

**Table S1.** Comparison of catalytic performance for  $\text{Fe}_5\text{O}_7(\text{OH})\cdot 4\text{H}_2\text{O}/\text{NF}$  with other Fe-based OER electrocatalysts under alkaline conditions.

| Catalyst                                                              | $j$ ( $\text{mA cm}^{-2}$ ) | $\eta$ (mV) | Electrolyte | Ref.      |
|-----------------------------------------------------------------------|-----------------------------|-------------|-------------|-----------|
| $\text{Fe}_5\text{O}_7(\text{OH})\cdot 4\text{H}_2\text{O}/\text{NF}$ | 100                         | 269         | 1.0 M KOH   | This work |
| $\text{NiFe}_2\text{O}_4$                                             | 10                          | 262         | 1.0 M KOH   | 1         |
| $\text{NF@NC-CoFe}_2\text{O}_4$                                       | 100                         | 290         | 1.0 M KOH   | 2         |
| $\text{NiO}/\text{NiFe}_2\text{O}_4$                                  | 10                          | 303         | 1.0 M KOH   | 3         |
| $\text{Fe}_x\text{N}$                                                 | 100                         | 290         | 1.0 M KOH   | 4         |
| $\text{Ni@FeOOH}$                                                     | 100                         | 370         | 1.0 M KOH   | 5         |

|                                                         |     |       |           |    |
|---------------------------------------------------------|-----|-------|-----------|----|
| Fe <sub>1.3</sub> Mn <sub>0.3</sub> P                   | 10  | 490   | 1.0 M KOH | 6  |
| FeP                                                     | 100 | 420   | 1.0 M KOH | 7  |
| (Co <sub>0.47</sub> Fe <sub>0.53</sub> ) <sub>2</sub> P | 10  | 290   | 1.0 M KOH | 8  |
| Fe-O <sub>2cat</sub>                                    | 100 | 537   | 1.0 M KOH | 9  |
| Iron oxyhydroxide                                       | 20  | 510   | 1.0 M KOH | 10 |
| NiFe LDH/NF                                             | 10  | 269   | 1.0 M KOH | 11 |
| NiFe-LDH/CNT                                            | 10  | 250   | 1.0 M KOH | 12 |
| Ni-Fe (oxy) hydroxide                                   | 10  | 275   | 1.0 M KOH | 13 |
| NiFe-LDH                                                | 10  | 309±2 | 0.1 M KOH | 14 |
| Fe-doped Ni <sub>2</sub> P/NF                           | 50  | 230   | 1.0 M KOH | 15 |
| Fe <sub>3</sub> C/NF                                    | 10  | 262   | 1.0 M KOH | 16 |
| FeS-Ni <sub>3</sub> S <sub>2</sub> /NF                  | 100 | 290   | 1.0 M KOH | 17 |
| Fe-MOF/NF                                               | 100 | 270   | 1.0 M KOH | 18 |

## References

- 1 H. Yang, Y. Liu, S. Luo, Z. Zhao, X. Wang, Y. Luo, Z. Wang, J. Jin and J. Ma, *ACS Catal.*, 2017, **7**, 5557-556xpp 7.
- 2 X.F. Lu, L. F. Gu, J. W. Wang, J. X. Wu, P. Q. Liao and G. R. Li, *Adv. Mater.*, 2017, **29**, 1604437.
- 3 B. K. Kang, M. H. Woo, J. Lee, Y. H. Song, Z. Wang, Y. Guo, Y. Yamauchi, J. H. Kim, B. Lim and D. H. Yoon, *J. Mater. Chem. A*, 2017, **5**, 4320-4324.
- 4 F. Yu, H. Zhou, Z. Zhu, J. Sun, R. He, J. Bao, S. Chen and Z. Ren, *ACS Catal.*, 2017, **7**, 2052-2057.
- 5 Y. Zhang, K. Rui, Z. Ma, W. Sun, Q. Wang, P. Wu, Q. Zhang, D. Li, M. Du, W. Zhang, H. Lin and J. Zhu, *Chem. Mater.*, 2018, **30**, 4762-4769.
- 6 D. Li, H. Baydoun, B. Kulikowski and S. L. Brock, *Chem. Mater.*, 2017, **29**, 3048-3054.
- 7 J. Xu, J. Li, D. Xiong, B. Zhang, Y. Liu, K. H. Wu, I. Amorim, W. Li and L. Liu, *Chem. Sci.*, 2018, **9**, 3470-3476.

- 8 Y. Tian, H. Wang, P. Liu, Y. Shen, C. Cheng, A. Hirata, T. Fujita, Z. Tang and M. Chen, *Energy Environ. Sci.*, 2016, **9**, 2257-2261.
- 9 X. Zou, Y. Wu, Y. Liu, D. Liu, W. Li, L. Gu, H. Liu, P. Wang, L. Sun and Y. Zhang, *Chem*, 2018, **4**, 1139-1152.
- 10 D. R. Chowdhury, L. Spicia, S. S. Amritphale, A. Paul and A. Singh, *J. Mater. Chem. A*, 2016, **4**, 3655-3660.
- 11 J. Luo, J. H. Im, M. T. Mayer, M. Schreier, M. K. Nazeeruddin, N. G. Park, S. D. Tilley, H. Fan and M. Graetzel, *Science*, 2014, **345**, 1593-1596.
- 12 M. Gong, Y. Li, H. Wang, Y. Liang, J. Z. Wu, J. Zhou, J. Wang, T. Regier, F. Wei and H. Dai, *J. Am. Chem. Soc.*, 2013, **135**, 8452-8455.
- 13 A. S. Batchellor and S. W. Boettcher, *ACS Catal.*, 2015, **5**, 6680-6689.
- 14 S. Drespf, F. Luo, R. Schmack, S. Ku"hl, M. Gliech and P. Strasser, *Energ. Environ. Sci.*, 2016, **9**, 2020-2024.
- 15 Y. Li, H. Zhang, M. Jiang, Q. Zhang, P. He and X. Sun, *Adv. Funct. Mater.*, 2017, **27**, 1702513.
- 16 S. Zhu, J. Lei, L. Zhang and L. Lu, *Int. J. Hydrogen. Energ.*, 2019, **44**, 16507-16515.
- 17 F. Wu, X. Guo, G. Hao, Y. Hu and W. Jiang, *Adv. Mater. Interfaces.*, 2019, **6**, 1900788.
- 18 X. Zhang, Q. Liu, X. Shi, M. Asiri and X. Sun, *Inorg. Chem. Front.*, 2018, **5**, 1405-1408.
